# Supplementary material for: Selective and sensitive detection of cysteine in water and live cells using a coumarin–Cu2+ fluorescent ensemble
Source: Royal Society of Chemistry journal article supplement (doi:10.1039/c8nj03809k), 2018-01-01
Supplement: c8nj03809k1.pdf [file c8nj03809k1.pdf]

## Supplementary Material

### **Selective and sensitive detection of cysteine in water and live cells by a coumarin-Cu<sup>2+</sup> fluorescence ensemble**

Yue Wang,<sup>a</sup> Qingtao Meng,<sup>\*a,b</sup> Qian Han,<sup>a</sup> Guangjie He,<sup>\*c</sup> Yaoyun Hu,<sup>a</sup> Huan Feng,<sup>a</sup> Hongmin Jia,<sup>a</sup> Run Zhang,<sup>d</sup> and Zhiqiang Zhang<sup>\*b</sup>

<sup>a</sup> School of Chemical Engineering, University of Science and Technology Liaoning, Anshan, Liaoning, 114051, P. R. China. E-mail: qtmeng@ustl.edu.cn, Tel: +86-412-5929627

<sup>b</sup> Key Laboratory for Functional Material, Educational Department of Liaoning Province, University of Science and Technology Liaoning, Anshan 114051, P. R. China. E-mail: zhangzhiqiang@ustl.edu.cn, Tel: +86-421-5928002.

<sup>c</sup> Department of Forensic Medicine, Xinxiang Medical University, XinXiang, Henan, 453003, P. R. China. E-mail: guangjiehe@163.com.

<sup>d</sup> Australian Institute for Bioengineering and Nanotechnology, The University of Queensland, Brisbane, 4072, Australia.

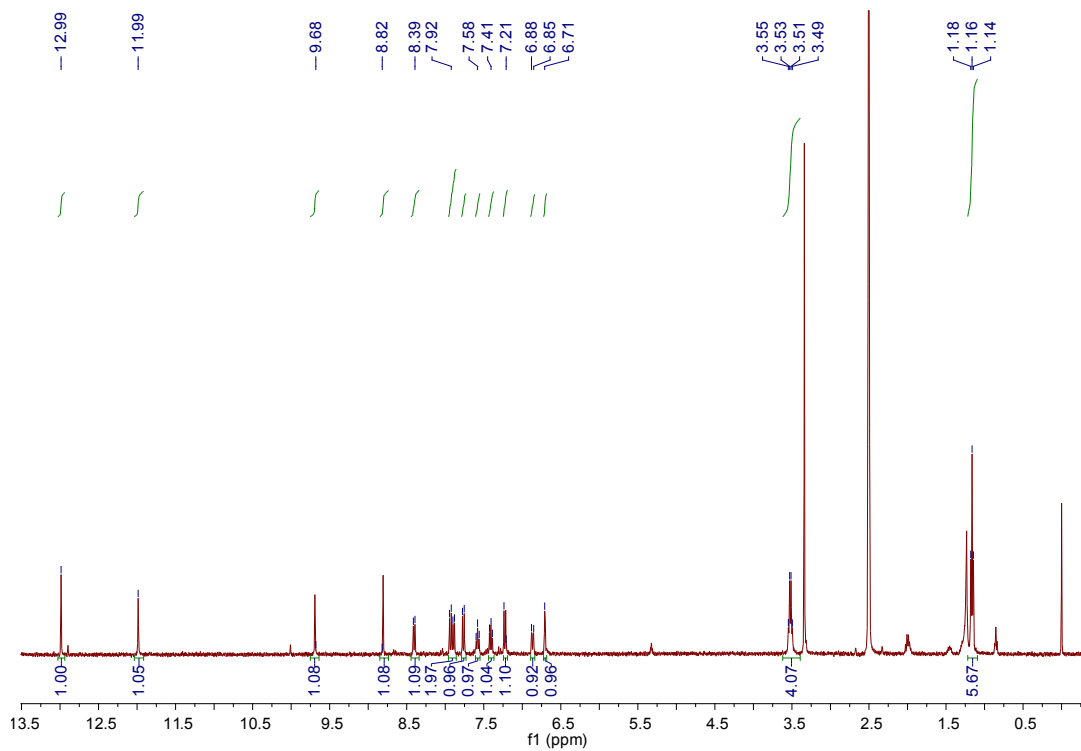

Fig. S1  $^1\text{H}$  NMR of L (DMSO- $d_6$ )

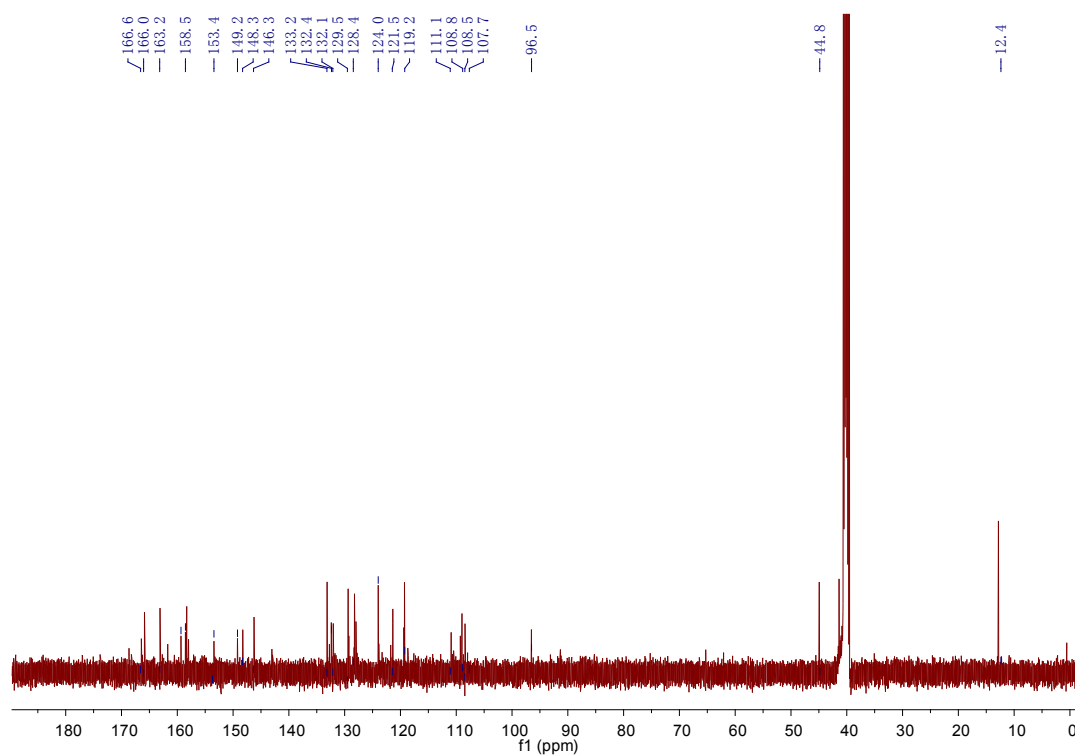

Fig. S2  $^{13}\text{C}$  NMR of L (DMSO- $d_6$ ).

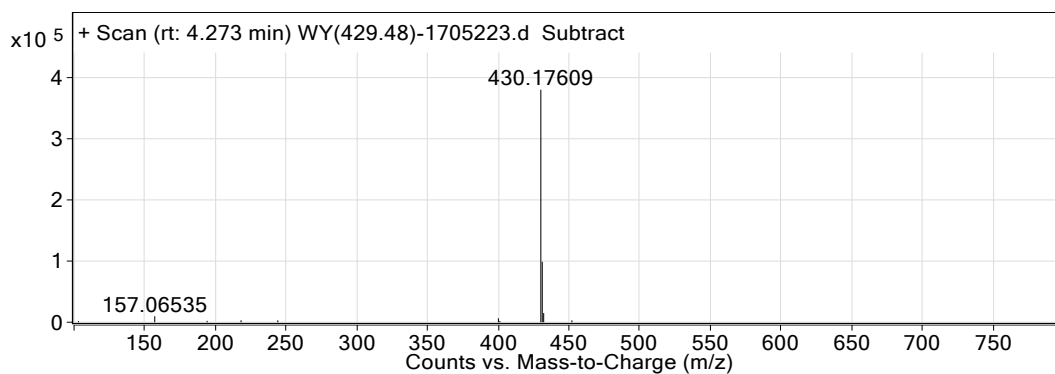

**Fig. S3** HR MS of L

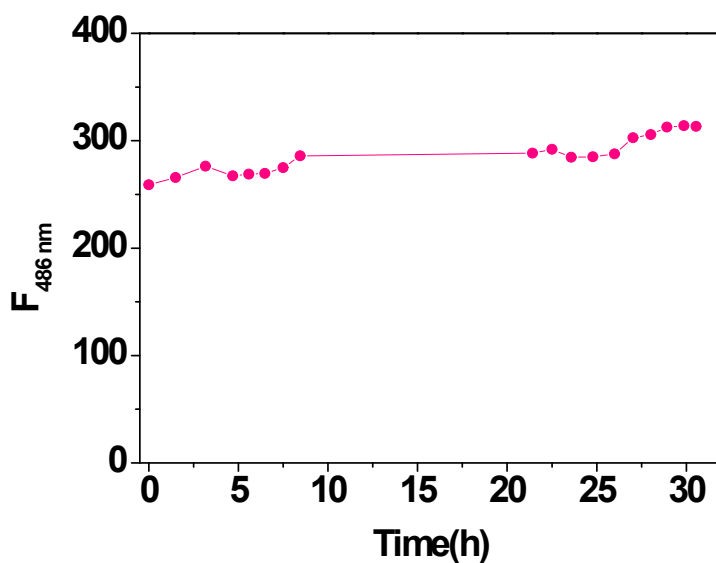

**Fig. S4** Fluorescence responses of L (10  $\mu$ M) at different time in HEPES aqueous buffer (CH<sub>3</sub>CN: HEPES = 7:3, 20 mM, pH = 7.4). Excitation at 420 nm.

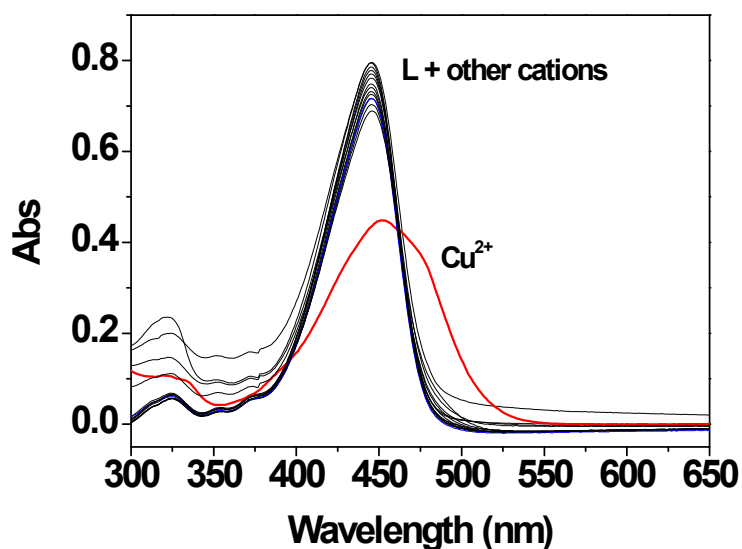

**Fig. S5** Absorption spectra of L (10  $\mu$ M) in HEPES aqueous buffer (CH<sub>3</sub>CN: HEPES = 7:3, 20 mM, pH = 7.4) upon addition of various metal ions (10  $\mu$ M).

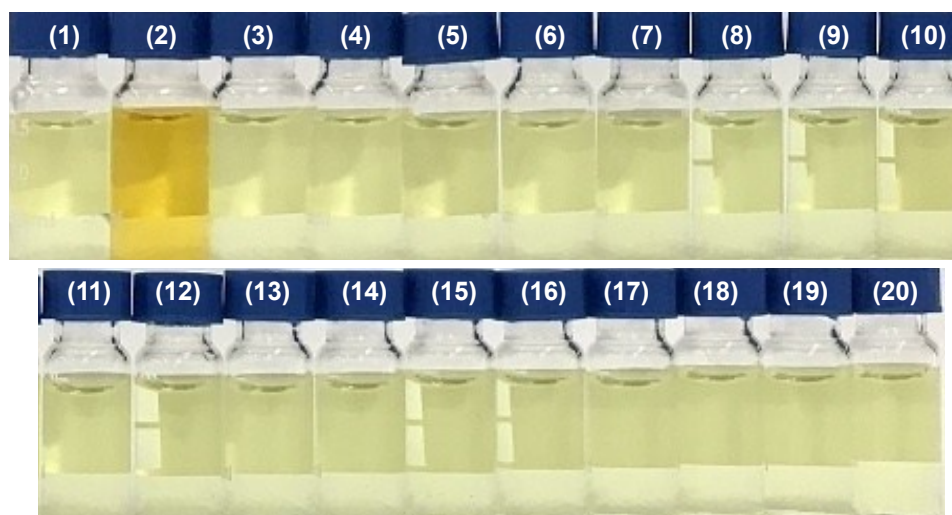

**Fig. S6** Color responses of **L** (10  $\mu\text{M}$ ) in HEPES aqueous buffer ( $\text{CH}_3\text{CN}$ : HEPES = 7:3, 20 mM, pH = 7.4) upon addition of various metal ions (10  $\mu\text{M}$ ). From left to right: (1) free **L**, (2)  $\text{Cu}^{2+}$ , (3)  $\text{Fe}^{3+}$ , (4)  $\text{Hg}^{2+}$ , (5)  $\text{Cd}^{2+}$ , (6)  $\text{Pb}^{2+}$ , (7)  $\text{Zn}^{2+}$ , (8)  $\text{Ni}^{2+}$ , (9)  $\text{Mn}^{2+}$ , (10)  $\text{Cr}^{3+}$ , (11)  $\text{Ag}^+$ , (12)  $\text{Ca}^{2+}$ , (13)  $\text{Mg}^{2+}$ , (14)  $\text{Ba}^{2+}$ , (15)  $\text{Li}^+$ , (16)  $\text{K}^+$ , (17)  $\text{Na}^+$ , (18) All cations mixed.

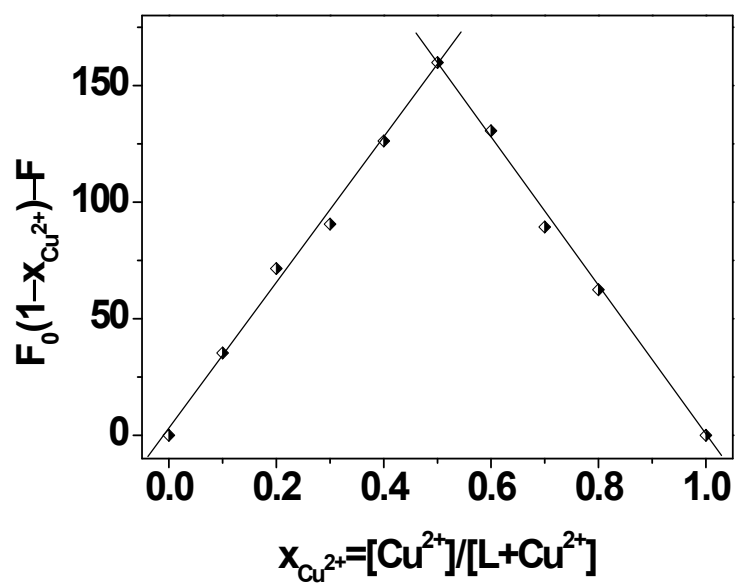

**Fig. S7** Job's plots according to the method for continuous variations. The total concentration of **L** (10  $\mu\text{M}$ ) and  $\text{Cu}^{2+}$  is 10  $\mu\text{M}$ . Excitation at 420 nm.

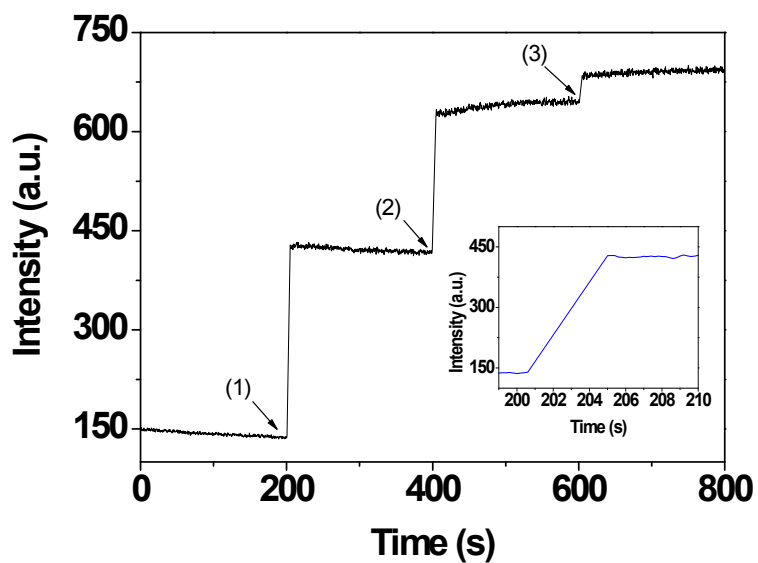

**Fig. S8** Time course of fluorescence intensity of L-Cu<sup>2+</sup> (10 μM) at 486 nm upon addition of Cys. Arrows represent sequentially addition of (1) 5 μM, (2) 15 μM and (3) 20 μM Cys. Excitation was performed at 420 nm.

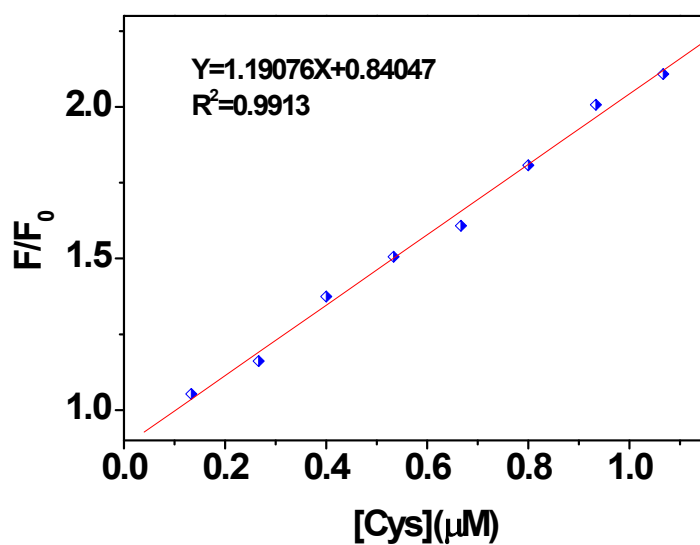

**Fig. S9** Linear relationship between fluorescence intensity of L-Cu<sup>2+</sup> (2 μM) at 486 nm versus the concentration of Cys (0–1.0 μM) in HEPES aqueous buffer (CH<sub>3</sub>CN: HEPES = 7:3, 20 mM, pH = 7.4). Excitation was performed at 420 nm.

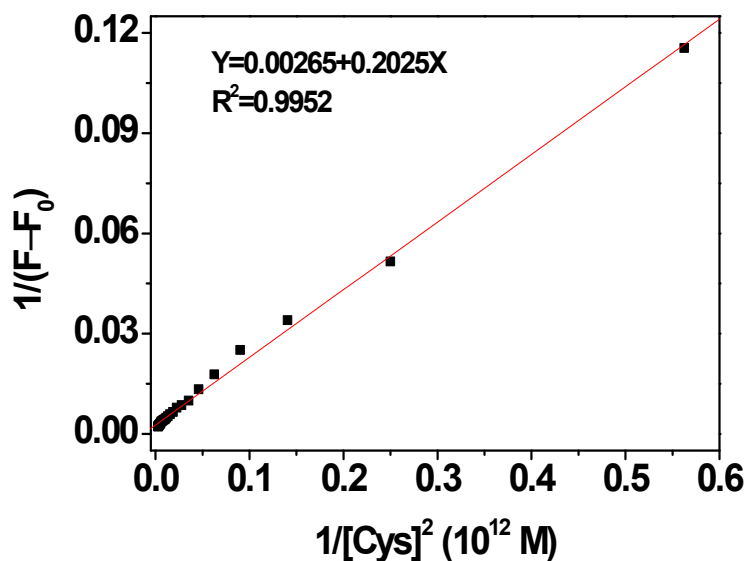

**Fig. S10** Benesi-Hildebrand plot (emission at 486 nm) of  $L-Cu^{2+}$  based on 1:2 binding stoichiometry with Cys. Excitation was performed at 420 nm.

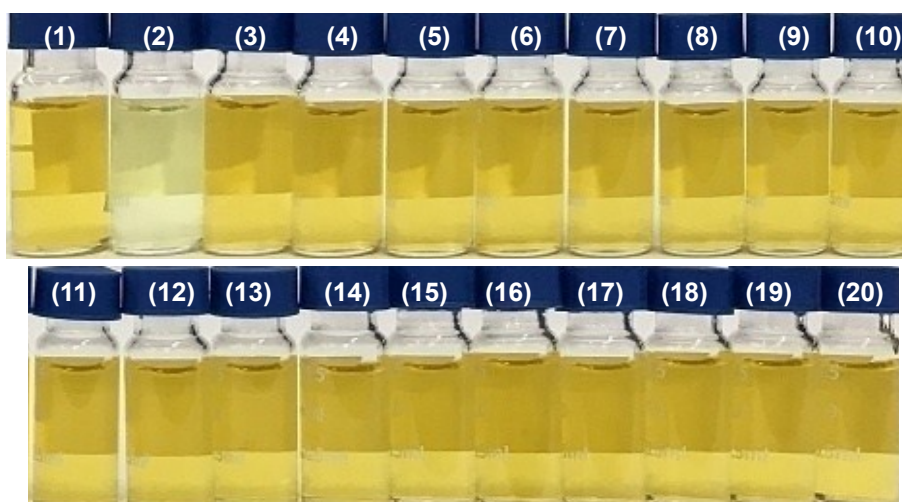

**Fig. S11** Colour responses of  $L-Cu^{2+}$  ( $10 \mu M$ ) in HEPES aqueous buffer ( $CH_3CN$ : HEPES = 7:3, 20 mM, pH = 7.4) upon addition of various biothiols and amino acids ( $30 \mu M$ ): (1) free  $L-Cu^{2+}$ , (2) Cys, (3) Ala, (4) Asp, (5) Gln, (6) Gly, (7) Hcy, (8) Lys, (9) Phe, (10) Pro, (11) Ser, (12) Thr, (13) Try, (14) Val, (15) Leu, (16) His, (17) Arg, (18) Asn, (19) GSH, (20) Glu.

**Table S1.** Comparison of  $L-Cu^{2+}$  with recently reported fluorescent probes for biothiols detection.

| Probes | Selectivity      | Limit of detection (LOD)                                       | Colour changes | Response time | Ref. |
|--------|------------------|----------------------------------------------------------------|----------------|---------------|------|
| 1      | Cys, Hcy and GSH | Cys: $0.518 \mu M$<br>Hcy: $0.658 \mu M$<br>GSH: $0.246 \mu M$ | -              | > 10 min      | 1    |

|                                       |                                               |                                                                                                                   |                               |                                            |              |
|---------------------------------------|-----------------------------------------------|-------------------------------------------------------------------------------------------------------------------|-------------------------------|--------------------------------------------|--------------|
| <b>DACP-1</b><br>and<br><b>DACP-2</b> | Cys, Hcy and GSH                              | For GSH:<br>10.1 nM ( <b>DACP-1</b> ) and<br>17.0 nM ( <b>DACP-2</b> )                                            | -                             | within ~5–10 min                           | 2            |
|                                       |                                               | For Cys:<br>0.31 $\mu$ M ( <b>DACP-1</b> ) and<br>1.27 $\mu$ M ( <b>DACP-2</b> )                                  |                               |                                            |              |
| <b>CNF</b>                            | Cys/Hcy, GSH and H <sub>2</sub> S             | 0.59 $\mu$ M (for Cys)<br>0.56 $\mu$ M (for Hcy)<br>0.78 $\mu$ M (for GSH)<br>0.52 $\mu$ M (for H <sub>2</sub> S) | -                             | Cys/Hcy: 30 min<br>H <sub>2</sub> S: 5 min | 3            |
| <b>CS-thiols</b>                      | Cys, Hcy and GSH                              | $4.3 \times 10^{-5}$ (for Cys)                                                                                    | -                             | within 10 min                              | 4            |
| <b>1-Cu(II)</b>                       | Cys, Hcy and GSH                              | $10^{-8}$ M (GSH)                                                                                                 | Pink to green                 | 10 min                                     | 5            |
| <b>NP</b>                             | Cys, Hcy and GSH                              | 1.5 $\mu$ M (for Cys)<br>1.8 $\mu$ M (for Hcy)<br>2.2 $\mu$ M (for GSH)                                           | -                             | -                                          | 6            |
| <b>HNA</b>                            | Cys, Hcy and GSH                              | 1.5 $\mu$ M (for Cys)<br>1.0 $\mu$ M (for Hcy)<br>0.8 $\mu$ M (for GSH)                                           | Yellow to yellowish           | -                                          | 7            |
| <b>Probe 2</b>                        | Cys (slight interference<br>from Hcy and GSH) | 0.084 $\mu$ M                                                                                                     | Colorless to yellow           | 5 min                                      | 8            |
| <b>probe 1</b>                        | Cys and Hcy                                   | $1.6 \times 10^{-7}$ M (Cys)<br>$1.8 \times 10^{-7}$ M (Hcy)                                                      | Dark blue to yellow-<br>green | 25 min                                     | 9            |
| <b>AQDA</b>                           | Cys                                           | $1.58 \times 10^{-7}$ M                                                                                           | Colorless to orange           | 90 min                                     | 10           |
| <b>R1</b>                             | Cys                                           | $4.61 \times 10^{-8}$ M                                                                                           | Pink to colorless             | within 1.0 min                             | 11           |
| <b>Cy-NB</b>                          | Cys                                           | 0.2 $\mu$ M                                                                                                       | Blue to green                 | within 5 min                               | 12           |
| <b>TP-NIR</b>                         | Cys                                           | 0.2 $\mu$ M                                                                                                       | Yellowish to yellow           | within 2 min                               | 13           |
| <b>SBD-Cl</b>                         | Cys                                           | $1.4 \times 10^{-6}$ M                                                                                            | Yellowish to yellow           | within about 1 h                           | 14           |
| <b>BTAC</b>                           | Cys                                           | 124 nM                                                                                                            | Colorless to yellow           | within 3 min                               | 15           |
| <b>L-Cu<sup>2+</sup></b>              | Cys                                           | 15 nM                                                                                                             | Yellow-yellowish              | < 4 s                                      | This<br>work |

### References:

1. Q. Miao, Q. Li, Q. Yuan, L. Li, Z. Hai, S. Liu and G. Liang, *Anal. Chem.*, 2015, **87**, 3460–3466.
2. S. V. Mulay, Y. Kim, M. Choi, D. Y. Lee, J. Choi, Y. Lee, S. Jon and D. G. Churchill, *Anal. Chem.*, 2018, **90**, 2648–2654.
3. L. He, X. Yang, K. Xu, Y. Yang and W. Lin, *Chem. Commun.*, 2017, **53**, 13168–13171.
4. K. Liu, H. Shang, X. Kong and W. Lin, *J. Mater. Chem. B*, 2017, **5**, 3836–3841.
5. H. S. Jung, J. H. Han, Y. Habata, C. Kang and J. S. Kim, *Chem. Commun.*, 2011, **47**, 5142–5144.
6. Y. Wang, Z. Q. Zhang, Q. T. Meng, C. He, R. Zhang and C. Y. Duan, *J. Lumin.*, 2016, **175**, 122–128.

7. H. M. Jia, M. Yang, Q. T. Meng, G. J. He, Y. Wang, Z. Z. Hu, R. Zhang and Z. Q. Zhang, *Sensors*, 2016, **16**, 79; doi:10.3390/s16010079.
8. J. Guo, Z. Kuai, Z. Zhang, Q. Yang, Y. Shan and Y. Lia, *RSC Adv.*, 2017, **7**, 18867–18873.
9. Z.-H. Fu, X. Han, Y. Shao, J. Fang, Z.-H. Zhang, Y.-W. Wang and Y. Peng, *Anal. Chem.*, 2017, **89**, 1937–1944.
10. H. Lv, X.-F. Yang, Y. Zhong, Y. Guo, Z. Li and H. Li, *Anal. Chem.*, 2014, **86**, 1800–1807.
11. U. Diwan, V. Kumar, R. K. Mishra, N. K. Rana, B. Koche and K. K. Upadhyay, *RSC Adv.*, 2016, **6**, 95722–95728.
12. K. Yin, F. Yu, W. Zhang, L. Chen, *Biosens. Bioelectron.*, 2015, **74**, 156–164.
13. J. Wang, B. Li, W. Zhao, X. Zhang, X. Luo, M. E. Corkins, S. L. Cole, C. Wang, Y. Xiao, X. Bi, Y. Pang, C. A. McElroy, A. J. Bird and Y. Dong, *ACS Sens.*, 2016, **1**, 882–887.
14. L. He, X. Yang, K. Xu and W. Lin, *Anal. Chem.*, 2017, **89**, 9567–9573.
15. S. Manna, P. Karmakar, S. S. Ali, U. N. Guria, R. Sarkar, P. Datta, D. Mandal and A. K. Mahapatra, *New J. Chem.*, 2018, **42**, 4951–4958.
